# Supplementary material
Source: publisher site journal article supplement (https://thieme-connect.com/media/10.1055-s-00035023/201206/supmat/10-3415-vcot-11-12-0170-supp.pdf)
Supplement: Supplementary file 1 [file 10-3415-vcot-11-12-0170-supp.pdf]

Supplementary Material to:

## Minimally displaced tibial tuberosity avulsion fracture in nine skeletally immature large breed dogs

*D. J. F. von Pfeil; C. E. DeCamp; K. Hayashi; C. W. Probst; L. M. Dejardin; N. Priddy II; M. Ritter; S. Johnston*

Vet Comp Orthop Traumatol 2012; 25:  
doi:10.3415/VCOT-11-12-0170

**Appendix table:** Summary of clinical cases affected by minimally displaced tibial tuberosity avulsion fracture (MTTAF). TT: Tibial tuberosity. N/A: Not available. M = male entire; M/N = male neutered; F = female entire; F/S = female spayed;

\* The authors would like to acknowledge that this case has been previously reported (14).

| Case | Age (months) | Breed                    | Sex | Weight (kg) | History relating lameness to a traumatic event | Lame-ness score | Duration of clinical signs (days) | Findings upon orthopedic examination                                                       | Diagnosis (Side, type MTTAF) | Other orthopedic conditions | Treatment                                                            | Radio-graphic follow-up (days) | Time of follow-up (days of first, and subsequent follow-up) | Time to pre-injury gait (days) | Outcome   |
|------|--------------|--------------------------|-----|-------------|------------------------------------------------|-----------------|-----------------------------------|--------------------------------------------------------------------------------------------|------------------------------|-----------------------------|----------------------------------------------------------------------|--------------------------------|-------------------------------------------------------------|--------------------------------|-----------|
| 1*   | 13           | Scottish Deerhound       | M   | 35          | No                                             | 2               | 14                                | Swelling at left TT, bilateral pain upon pressure to TTs                                   | Right: II<br>Left: I         | None                        | Pins and tension band on the right.<br><br>Non-surgical on the left. | N/A                            | 42 & 1170                                                   | 21                             | Excellent |
| 2    | 12           | German Shepherd dog      | M/N | 32.7        | No                                             | 2.5             | 24                                | Mild bilateral swelling and pain upon pressure of the TT                                   | Bilateral: I                 | None                        | Non-surgical                                                         | N/A                            | 42                                                          | 30                             | Excellent |
| 3    | 13           | Greyhound                | M   | 23.4        | No                                             | 2               | 7                                 | Significant pain with direct pressure to right TT. Mild swelling distal to right TT        | Right: II                    | None                        | Non-surgical                                                         | 61 & 213                       | 61 & 213                                                    | 77                             | Excellent |
| 4    | 9            | Australian Shepherd      | F/S | 26.1        | No                                             | 2               | 21                                | Painful left TT. Mild swelling 1 cm distal to insertion of left straight patellar ligament | Left: I                      | None                        | Non-surgical                                                         | 14 & 305                       | 305                                                         | 14                             | Excellent |
| 5    | 10           | German Shorthair Pointer | M/N | 24.3        | Running hard                                   | 3               | 2                                 | Painful upon flexion and extension of right stifle                                         | Right: II                    | None                        | Non-surgical                                                         | 30 & 90                        | 2124                                                        | 90                             | Excellent |
| 6    | 11           | Boxer/Cattle dog mix     | M/N | 22          | Aggressive play                                | 4               | 1                                 | Swollen and painful right TT                                                               | Right: I                     | None                        | Non-surgical                                                         | 30,60,83                       | 30,60,83                                                    | 120                            | Excellent |
| 7    | 14           | Labrador mix             | M/N | 31.3        | Running with other dogs                        | 4               | 8                                 | Painful upon pressure on right TT                                                          | Right: I                     | None                        | Non-surgical                                                         | N/A                            | 15, 135                                                     | 15                             | Excellent |

|   |    |                         |     |      |                                                       |   |    |                                     |           |      |              |     |    |    |           |
|---|----|-------------------------|-----|------|-------------------------------------------------------|---|----|-------------------------------------|-----------|------|--------------|-----|----|----|-----------|
|   |    |                         |     |      |                                                       |   |    |                                     |           |      |              |     |    |    |           |
| 8 | 13 | Husky mix               | F/S | 21.5 | Hard mountain run                                     | 3 | 12 | Painful upon pressure on right TT   | Right: II | None | Non-surgical | N/A | 49 | 28 | Excellent |
| 9 | 10 | Rottweiler-Labrador mix | F   | 27.3 | Possibly-lame after unobserved in yard for entire day | 2 | 1  | Discomfort upon pressure on left TT | Left: II  | None | Non-surgical | N/A | 29 | 21 | Excellent |
